# Supplementary figures and images for: Cancer cell-autonomous overactivation of PARP1 compromises immunosurveillance in non-small cell lung cancer
Source: HighWire-hosted journal article supplement (doi:10.1136/jitc-2021-004280), 2022-06-01

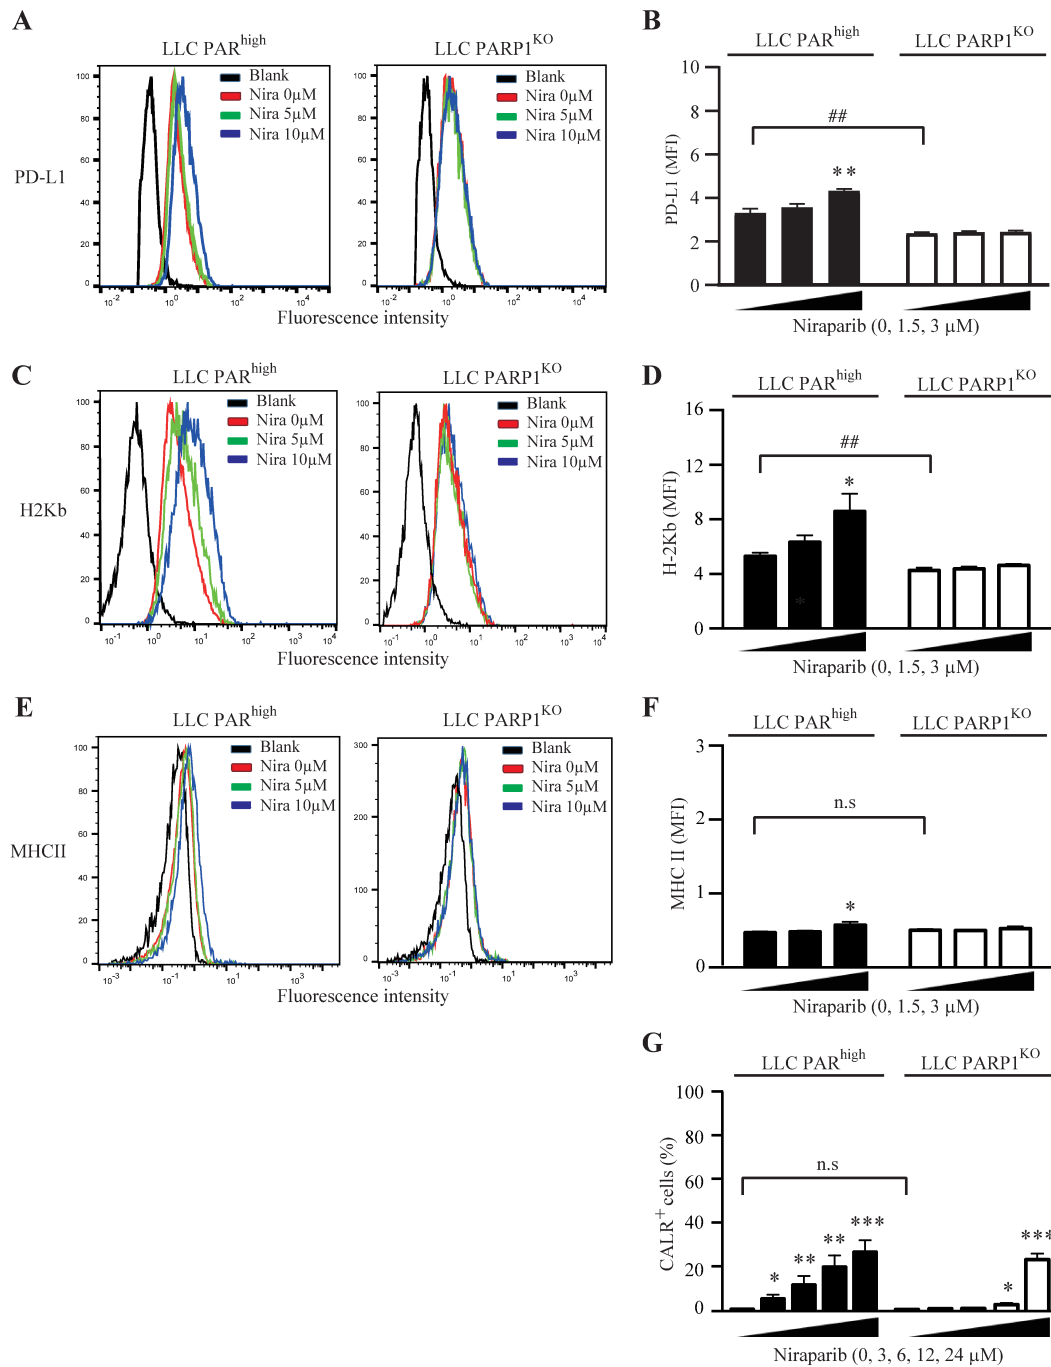

Supplemental figure 13

Supplement: jitc-2021-004280supp013_data_supplement.pdf [file jitc-2021-004280supp013_data_supplement.pdf]

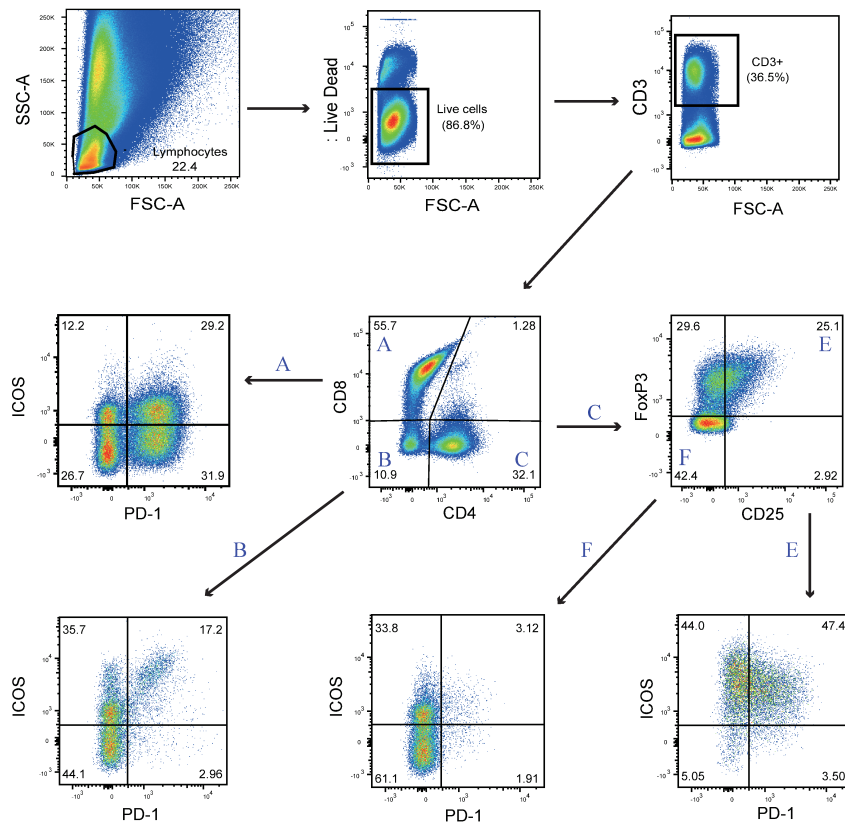

**Supplemental figure 5**

Supplement: jitc-2021-004280supp005_data_supplement.pdf [file jitc-2021-004280supp005_data_supplement.pdf]

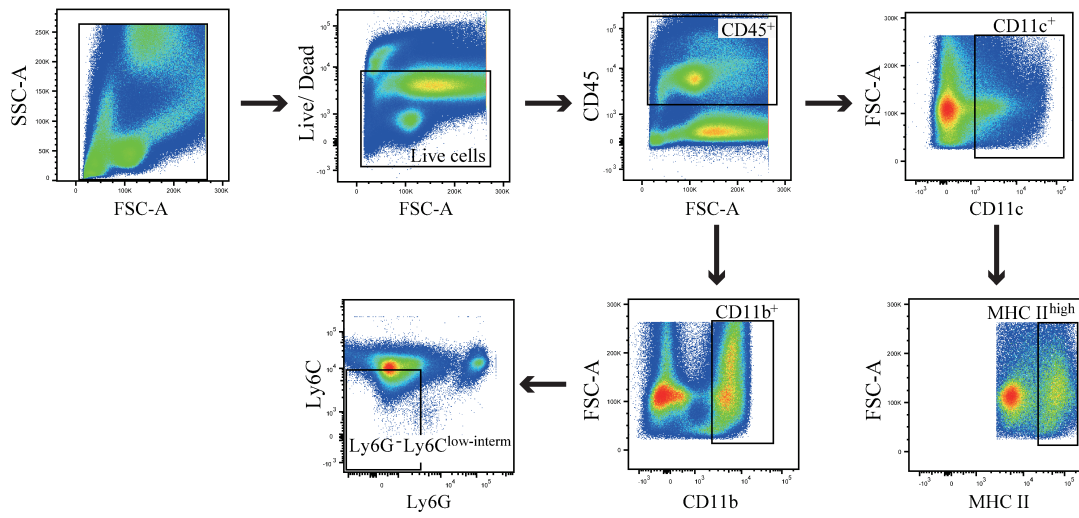

Supplemental figure 8

Supplement: jitc-2021-004280supp008_data_supplement.pdf [file jitc-2021-004280supp008_data_supplement.pdf]

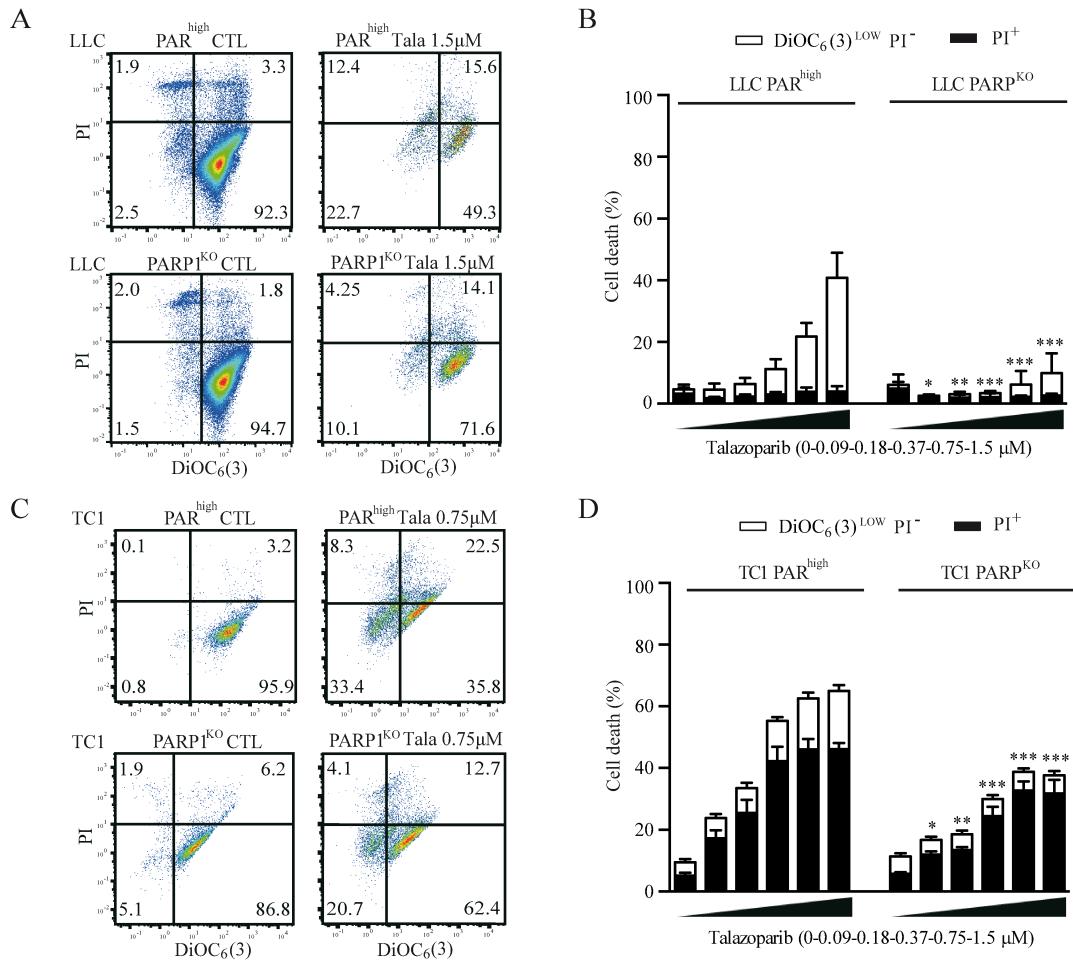

Supplemental Figure 10

Supplement: jitc-2021-004280supp010_data_supplement.pdf [file jitc-2021-004280supp010_data_supplement.pdf]
